# Supplementary material for: Nano/Mesoporous Carbon from Rice Starch for Voltammetric Detection of Ascorbic Acid
Source: PubMed Central journal article supplement (PMC6017438; doi:10.3390/molecules23020234), 2018-01-25
Supplement: molecules-23-00234-s001.pdf [file molecules-23-00234-s001.pdf]

## Supporting information

Nano/mesoporous Carbon from Rice Starch for Voltammetric Detection of Ascorbic Acid

Md A Wahab,<sup>ab\*Π</sup> Farzana Darain<sup>bdΠ</sup>, Nazrul Islam,<sup>c</sup> and David James Young<sup>a\*</sup>

<sup>abΠ</sup> Faculty of Science, Health, Education and Engineering, University of the Sunshine Coast, Maroochydore DC, Queensland 4558, Australia; <sup>c</sup>Pharmacy Discipline, Faculty of Health, School of Clinical Sciences, QUT, 2 George Street, Queensland, Australia

<sup>b</sup>AIBN, University of Queensland, Australia

<sup>dΠ</sup>Sugar Research Australia Ltd., Indooroopilly, Brisbane, Australia.

Π = Current affiliation and equal contributor

\*Corresponding E-mails: [mawahab@gmail.com](mailto:mawahab@gmail.com); [mwahab@usc.edu.au](mailto:mwahab@usc.edu.au); [dyoung1@usc.edu.au](mailto:dyoung1@usc.edu.au)

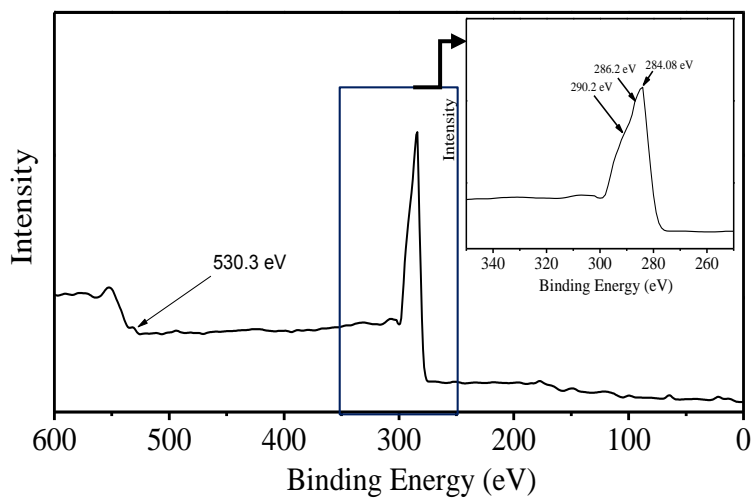

Figure SI 1. XPS data of RSNMC material.

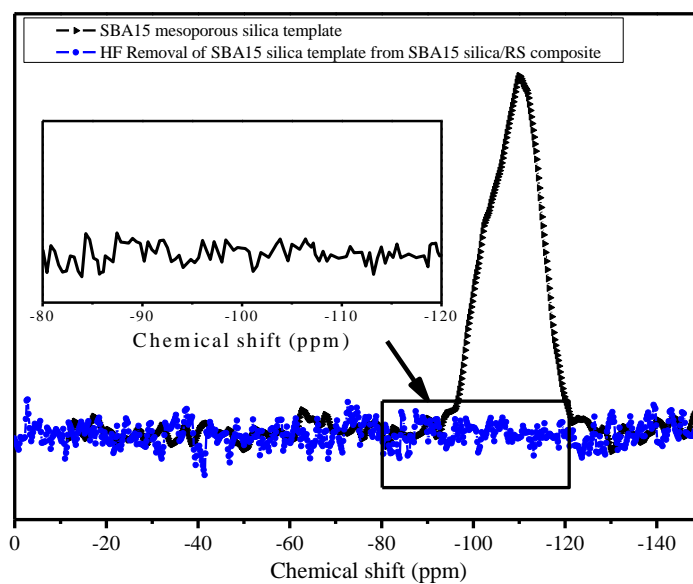

Figure SI 2. SBA15 silica removal by HF washing.

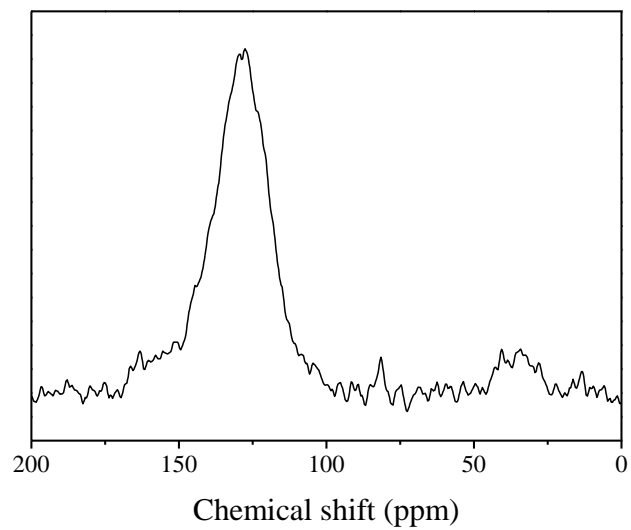

Figure SI 3.  $^{13}\text{C}$  NMR spectrum of RSNMC after removing SBA15 silica template
